# Supplementary material for: The Effects of Plant Growth-Promoting Bacteria (PGPB) Inoculation on Growth, Yield, and Grain Nutrient Uptake of Two Teff Varieties Under Greenhouse Condition
Source: Preprints.org preprint supplement (doi:10.20944/preprints202103.0046.v1), 2021-03-02
Supplement: Supplementary file 1 [file supplementary]

**Cover letter**

Tittle: The Effects of plant growth-promoting bacteria (PGPB) inoculation on teff growth, yield, and grain nutrient uptake of two teff varieties under field conditions

I/We certify that I/we have participated and contributed sufficiently for the completion of the manuscript and have agreed to have my/our name listed as a contributor.

I/We believe that the manuscript represents valid and credible work. Neither the content of this manuscript nor any other unified content with substantially similar or comparable substance under my/our creation or authorship has been published/is constantly considered for publication elsewhere. I/We certify that complete data regarding the study is proclaimed in this manuscript and no data from the study have been/will be published solely or separately. I/we attest that, I/we will cooperate in providing any required data/information related to the study during peer review by the editor or their assignees. Any direct or indirect financial interests or conflicts that exist or may be perceived to exist have been disclosed in the cover letter. Sources of external support for this work are mentioned in the cover letter.

All persons who have made substantial and significant contributions to this work, but are not contributors, are mentioned in the acknowledgement with the written permission of the contributors to include their name. If there is no acknowledgement part in the manuscript, that means I/we have not received any contributions and also, no contributor has been omitted.

***Please provide the Corresponding author details mentioned below***

Name: Zerihun Tsegaye

Department: Microbiology

University/Organisation: Addis Ababa University

Country: Ethiopia

Phone Number: +251936451046

Fax: +251116613722

**S.No. Name Signature Date Signed**

1. __________________________ __________________________
2. __________________________ __________________________
3. __________________________ __________________________
4. __________________________ __________________________
